Disease control by micrograzers

1 **Microbial grazers may aid in controlling infections caused by aquatic**  
2 **zoosporic fungi**

3 **Hazel N. Farthing<sup>2, +</sup>, Jiamei Jiang<sup>1, +</sup>, Alexandra J. Henwood<sup>2</sup>, Andy Fenton<sup>2</sup>, Trent**  
4 **Garner<sup>3</sup>, David R. Daversa<sup>2,3</sup>, Matthew C. Fisher<sup>4</sup>, David J. S. Montagnes<sup>2\*</sup>**

5

6 <sup>1</sup> Shanghai Universities Key Laboratory of Marine Animal Taxonomy and Evolution, Key Laboratory  
7 of Exploration and Utilization of Aquatic Genetic Resources, National Demonstration Center for  
8 Experimental Fisheries Science Education, Shanghai Ocean University, Shanghai 201306 China

9 <sup>2</sup> Institute of Integrative Biology, BioSciences Building, University of Liverpool, Liverpool L69 7ZB  
10 UK

11 <sup>3</sup> Institute of Zoology, Zoological Society of London, London, England, UK

12 <sup>4</sup> MRC Centre for Global Infectious Disease Analysis, Imperial College London

13

14 <sup>+</sup> These co- first authors contributed equally to this work.

15 **\* Correspondence:**

16 David Montagnes

17 [dmontag@liv.ac.uk](mailto:dmontag@liv.ac.uk)

18

19 **Key words: *Batrachochytrium dendrobatidis*, ciliates, disease, fungi, microbial loop,**  
20 **protozoa, *Tetrahymena***

21

## Disease control by micrograzers

### 22 **Abstract**

23 Free-living eukaryotic microbes may reduce animal diseases. We evaluated the dynamics by  
24 which micrograzers (primarily protozoa) apply top-down control on the chytrid  
25 *Batrachochytrium dendrobatidis* (*Bd*) a devastating, panzootic pathogen of amphibians.  
26 Although micrograzers consumed zoospores ( $\sim 3 \mu\text{m}$ ), the dispersal stage of chytrids, not all  
27 species grew monoxenically on zoospores. However, the ubiquitous ciliate *Tetrahymena*  
28 *pyriformis*, which likely co-occurs with *Bd*, grew at near its maximum rate ( $r = 1.7 \text{ d}^{-1}$ ). A  
29 functional response (ingestion vs. prey abundance) for *T. pyriformis*, measured using spore-  
30 surrogates (microspheres) revealed maximum ingestion ( $I_{\text{max}}$ ) of  $1.63 \times 10^3$  zoospores  $\text{d}^{-1}$ ,  
31 with a half saturation constant ( $k$ ) of  $5.75 \times 10^3$  zoospores  $\text{ml}^{-1}$ . Using these growth and  
32 grazing data we developed and assessed a population model that incorporated chytrid-host  
33 and micrograzer dynamics. Simulations using our data and realistic parameters obtained  
34 from the literature suggested that micrograzers could control *Bd* and potentially prevent  
35 chytridiomycosis (defined as  $10^4$  sporangia  $\text{host}^{-1}$ ). However, simulated inferior micrograzers  
36 ( $0.7 \times I_{\text{max}}$  and  $1.5 \times k$ ) did not prevent chytridiomycosis, although they ultimately reduced  
37 pathogen abundance to below levels resulting in disease. These findings indicate how  
38 micrograzer responses can be applied when modelling disease dynamics for *Bd* and other  
39 zoosporic fungi.

40

## Disease control by micrograzers

### 41 **Introduction**

42 Although the traditional microbial food web (i.e. prokaryotes and protists, *sensu* Azam et  
43 al. [1]) is well-established as a driver of aquatic productivity [2], micro-fungi are only now  
44 being appreciated as integral aquatic microbes. A dominant group of micro-fungi, the  
45 chytrids, are parasites of phytoplankton, zooplankton, and vertebrates [3], and zoospores, the  
46 chytrid dispersal stage, are argued to be nutritious and of an appropriate size for protozoan  
47 grazers [2, 3]. Hence, through top-down control micrograzers within the microbial food web  
48 have the potential to reduce the likelihood or severity of, or even prevent, disease outbreaks  
49 caused by these pathogens [3-5]. Here, by developing and parameterizing a population  
50 model we explore the dynamics by which microbial grazers may control the chytrid  
51 *Batrachochytrium dendrobatidis*, a panzootic pathogen of amphibians that is argued to have  
52 caused the greatest loss of biodiversity attributed to any disease [6].

53 *Batrachochytrium dendrobatidis* (henceforth, *Bd*) infects amphibian hosts through the  
54 dispersal of motile, 3-5  $\mu\text{m}$  zoospores (Fig. 1). The environmental pool of zoospores is  
55 instrumental in driving infection dynamics, as these can accrue in a dose-dependent manner  
56 [7], with for some hosts the size of the zoospore pool influencing long-term consequences for  
57 population survival or extinction [8]. It follows that processes that reduce the zoospore-pool  
58 should reduce the probability and intensity of disease outbreaks. Consumption of zoospores  
59 by naturally occurring micrograzers has been suggested to result in losses sufficient to reduce  
60 infections. Experiments show that some micrograzers may reduce the likelihood of *Bd*  
61 infections, and field data indicate a negative relationship between potential-grazer abundance  
62 and both the prevalence of infection and host mortality from disease [9-12]. There is now a  
63 need to build on these observations and investigate in more depth the dynamics by which  
64 consumers may impact on *Bd*.

## Disease control by micrograzers

65 Most work to date on the consumption of *Bd* zoospores has focused on large  
66 zooplankton, especially cladocerans [10, 13-15]. However, experiments on cladocerans have  
67 used unrealistically high micrograzer abundances (>10-100 times higher than natural levels),  
68 and at natural levels large zooplankton seem to have little impact on *Bd* infections [16].  
69 Micrograzers, in contrast, are abundant in shallow waters and are often near the bottom of  
70 ponds where infected hosts (e.g. benthic, grazing tadpoles) spend time resting and grazing on  
71 the substrate [17-19]. Furthermore, as many protozoa have generation times on the order of  
72 hours, by reproducing asexually when zoospores are abundant, micrograzer populations may  
73 increase several fold, consuming zoospores as they are released from the host. We, therefore,  
74 argue that protozoa will be more important than cladocerans in reducing the abundance of  
75 chytrid zoospores. This is supported by Schmeller et al. [12] who, using mesocosms, showed  
76 the ciliate *Paramecium* can significantly reduce the number of hosts infected with *Bd* by up  
77 to 65% when it is introduced at naturally occurring abundances.

78 We also suggest that the main impact of micrograzers on *Bd* spore-load will be in the  
79 water directly surrounding the host, where zoospores will be most abundant. Field studies  
80 suggest that in water bodies where *Bd* occurs, zoospore densities in the water column are low,  
81 ranging from ~0.5 to 500 L<sup>-1</sup> [20, 21]. In contrast, zoospores are shed from hosts at up to 250  
82 zoospores min<sup>-1</sup> [22], surviving only ~1-3 days [9]. Additionally, zoospores mostly disperse  
83 on the order of 1 cm [23], demonstrating chemotaxis towards keratinised skin over this  
84 distance [24, 25]. Although these laboratory-based rates will be dependent on environmental  
85 factors such as temperature [9], they suggest that the limited movement and survival of the  
86 rapidly produced zoospores will lead to dense aggregations in localized regions around the  
87 host. Recognising the likelihood of these local abundances and the well-established density-  
88 dependent feeding and growth responses of micrograzers [2], in this study we focused  
89 attention on the impact of micrograzers on *Bd* dynamics around the host. We achieved this

## Disease control by micrograzers

90 by: first, investigating a range of potential micrograzers, determining which survived on a  
91 diet of only *Bd* zoospores, and concentrating on those that grew; second, measuring ingestion  
92 and growth rates of a common species that thrives on *Bd*; and third, using these data,  
93 developing and exploring a model that couples the *Bd* life-cycle with micrograzer-control on  
94 zoospores. In doing so, we indicate the dynamics by which micrograzers may reduce *Bd*  
95 populations – potentially preventing disease – and provide a mechanism by which chytrid-  
96 diseases can be incorporated into microbial food web models.

97

## 98 **Materials and methods**

### 99 ***Culture maintenance***

100 *Batrachochytrium dendrobatidis* (*Bd*) cultures (strain #262 IA 9'13, Imperial Collage  
101 London) were maintained at 18 °C (at which all experiments were conducted) on H-broth  
102 medium (500 mL: 5 g Tryptone and 16 g glucose) and were regularly transferred (every ~5 d)  
103 to maintain exponential growth. Bacterial growth was prevented by the addition of  
104 antibiotics (Ampicillin at 100 µg ml<sup>-1</sup>; Kanamycin at 50 µg ml<sup>-1</sup>; Chloramphenicol at 34 µg  
105 ml<sup>-1</sup>). Micrograzers were obtained from Sciento (Manchester, UK): the ciliates *Blepharisma*  
106 sp., *Oxytrichia* sp., *Paramecium aurelia*, *Paramecium caudatum*, *Stentor coeruleus*,  
107 *Tetrahymena pyriformis*, and *Urocentrum turbo* and the rotifers *Brachionus calyciflorous*  
108 and *Philodina* sp. *Tetrahymena pyriformis* was maintained axenically for extended periods  
109 on H-broth. All other species were maintained prior to experiments on a natural assemblage  
110 of bacteria in Chalkley's medium enriched with cereal grains, as provided by Sciento [26].

### 111 ***Assessing growth of micrograzer species on Bd zoospores***

112 We tested the hypothesis that *Bd* zoospores were of nutritional benefit to the  
113 micrograzer. To do so, we compared growth with zoospores to when no food was available.

## Disease control by micrograzers

114 We also compared growth on zoospores to maximal rate of growth of the micrograzers,  
115 obtained from literature estimates (Fig 2).

116 Prior to introducing micrograzers, *Bd* was isolated from its growth medium to ensure that  
117 the medium was not a source of nutrients for the micrograzers. To do so, a *Bd* suspension (in  
118 exponential phase) was centrifuged (50 ml tubes, 5000 rpm, 6 min), the supernatant removed,  
119 and the pellet resuspended in autoclaved Volvic® mineral water to a concentration  $> 1.50 \times$   
120  $10^5 \text{ ml}^{-1}$  (determined microscopically). Bacterial growth was prevented with antibiotics, as  
121 above.

122 To assess growth rate, we followed our previous methods [27]. Micrograzers (9 species)  
123 were passed 5 times through autoclaved Volvic® water to remove bacteria. Then 5 to 8  
124 individuals, dependent on micrograzer size, were added to a 10 ml well containing the *Bd*  
125 suspension. Parallel treatments containing only sterile Volvic® water were used to assess  
126 mortality rate in the absence of prey. All treatments (i.e. species incubations with or without  
127 *Bd*) were replicated in triplicate (i.e. three 10 ml wells). To assess growth rate ( $r, \text{d}^{-1}$ ), the  
128 number of gazers in each well was determined microscopically after 2 or 3 days (depending  
129 on the observed change in abundance). Then, new *Bd* suspensions were prepared (as above),  
130 and micrograzers were transferred to these, maintaining *Bd* abundance. If micrograzer  
131 numbers decreased (net death occurred) over the incubation, then all individuals were  
132 transferred, but if numbers increased (net growth occurred) then the initial number was  
133 transferred. This procedure was continued for 14 days or until all micrograzers had died.  
134 Cultures were routinely checked to ensure there was no bacterial contamination.

135 When numbers increased between transfers, growth rate ( $r, \text{d}^{-1}$ ) was determined over  
136 each incubation period, as  $r = \ln(N_t/N_0)/t$ , where  $N_0$  and  $N_t$  are the micrograzer abundance on  
137 the initial and final day respectively, and  $t$  is the incubation period (2 or 3 days); to determine  
138 growth rate across all transfers (up to 14 d), the average of these was obtained. When

## Disease control by micrograzers

139 micrograzer numbers decreased between transfers, mortality rates ( $-r$ ,  $d^{-1}$ ) were determined as  
140 slope of  $\ln$  numbers over the entire incubation period. To assess if growth (or death) rate  
141 differed between treatments (i.e. with or without *Bd*) a two tailed t-test was conducted ( $\alpha =$   
142 0.05).

### 143 ***Quantifying the functional response of Tetrahymena grazing on Bd***

144 Our study focused on *Tetrahymena pyriformis* as: 1) it grew rapidly on *Bd* zoospores (see  
145 Results) and therefore clearly consumed and assimilated zoospores; 2) it is a model organism  
146 for which there are substantial data (see Discussion), and 3) it is common, globally, in  
147 habitats where *Bd* may occur (see Discussion). Prior to determining ingestion rate, *T.*  
148 *pyriformis* was acclimated with zoospores for >10 h. To do so, the ciliates were first  
149 removed from H-broth by centrifugation (50 ml tubes, 8000 rpm, 8 min) and then  
150 resuspended in 10 ml of autoclaved Volvic® water. To obtain only zoospores, a centrifuged  
151 *Bd* culture (as above) was filtered through a 5  $\mu\text{m}$  Nitex® mesh. Zoospores were then added  
152 to the water containing ciliates, to a total volume of 20 ml (resulting in  $\sim 10^6$  zoospores  $\text{ml}^{-1}$ ),  
153 with antibiotics (as above). This acclimation had no negative effects on the ciliates: after 10  
154 h, zoospore abundance had substantially decreased and ciliate abundance increased  
155 (indicating the ciliates were feeding and growing), the ciliates behaved similarly to when  
156 grown on H-broth (i.e. similar swimming pattern), and their cell size and shape were similar  
157 to when grown on H-broth.

158 To determine ingestion rate on spore-sized particles, 3  $\mu\text{m}$  fluorescent polymer  
159 microspheres (henceforth beads, Fluoro-Max™, Thermo Fisher Scientific, USA,) acted as a  
160 surrogate for *Bd* zoospores which are 3 - 5  $\mu\text{m}$  [28]. Bead concentrations,  $\sim 8 \times 10^3 \text{ ml}^{-1}$  to  
161  $10^6 \text{ ml}^{-1}$  (see Results), were prepared in autoclaved Volvic® water and vortexed prior to use,  
162 ensuring mono-dispersion. An aliquot (0.5 ml) of the acclimated ciliate culture (> 30  
163 micrograzers) was added to 1 ml of Volvic® water with beads, at various concentrations (with

## Disease control by micrograzers

164 more measurements at low abundances [29], see Results), and incubated for 5 or 10 min,  
165 depending on the bead concentration (preliminary experiments deemed these to be  
166 appropriate incubation periods). Incubations were terminated by fixing cells with ethanol  
167 (final concentration 70%). The average number of beads ingested per ciliate (>30 cells) was  
168 determined via fluorescent microscopy and was subsequently used to determine ingestion rate  
169 ( $I$ , prey  $d^{-1}$ ) at each prey concentration.

170 The relationship between ingestion rate and zoospore abundance ( $Z$   $ml^{-1}$ ), was  
171 determined by fitting a Type II functional response to the data:  $I = I_{max} * Z / (k + Z)$ , where  $I_{max}$   
172 ( $Z$   $min^{-1}$ ) is the maximum ingestion rate and  $k$  is the half saturation constant ( $Z$   $ml^{-1}$ ). The  
173 response was fit using the Marquardt-Levenberg algorithm (SigmaPlot, Systat, Germany);  
174 this algorithm is appropriate for describing such biological data sets [30].

### 175 ***Modelling micrograzer impacts on Bd populations***

176 To assess the dynamics by which grazing pressure impacts on *Bd* infection populations  
177 we developed and applied the following model that couples a reduced version of the *Bd*-load  
178 model [8] with the Rosenzweig-MacArthur predator-prey model [31]. Data for *T. pyriformis*  
179 were used to represent micrograzers (see the Discussion for a justification to focus on this  
180 species). Following logic outlined in the Introduction, the model describes the infection load  
181 on a single host and, as a proxy for the waters surrounding the host, only considers a volume  
182 of 10 ml around that host, where zoospores and micrograzers reside. As a metric to predict  
183 chytridiomycosis, it assumes that a sporangia load of  $10^4$  per host results in host mortality [8],  
184 with the recognition that this will vary between hosts and *Bd* strains [32, 33]. It does not  
185 include reduction of spore numbers by emigration as zoospores are unlikely to disperse far  
186 before dying [23], and we assume through chemokinesis, micrograzers remain near their food  
187 source [34-36]. The model is described by the following equations,

188



## Disease control by micrograzers

189 
$$\frac{dS}{dt} = yvZ - \sigma S \quad (1)$$

190 
$$\frac{dZ}{dt} = \eta S - yZ - \mu Z - \frac{I_{max}Z}{k+Z} G \quad (2)$$

191 
$$\frac{dG}{dt} = e \frac{I_{max}Z}{k+Z} G - dG \left(1 - \frac{b}{G}\right) \quad (3)$$

192 where for Eq. 1 and Eq. 2,  $S$  is the number of sporangia  $\text{ml}^{-1}$  (note for per host measurements  
193 this value is multiplied by 10);  $Z$  is the zoospore abundance ( $\text{ml}^{-1}$ );  $y$  is the per capita spore-  
194 host encounter rate;  $v$  is the fractional likelihood of spore infection per encounter;  $\sigma$  is the per  
195 capita sporangia mortality rate;  $\eta$  is the per sporangia spore-release rate; and  $\mu$  is the per  
196 capita spore mortality rate (see Table 1).

197 Then, Eq. 2 and Eq. 3 were coupled to include spore loss by micrograzers ( $G$ ), where  
198 grazing ( $I$ ) is dictated by the functional response (see *Tetrahymena pyriformis* ingestion,  
199 above);  $e$  is the abundance-based conversion efficiency, determined assuming a biomass-  
200 based estimate of  $e$  is  $\sim 0.1$  [37] and biovolumes of *Bd* zoospores and *T. pyriformis*; and  $d$  is  
201 the micrograzer per capita death rate. We assume here that *Bd* zoospores are not the only  
202 potential food source for the micrograzers, and so incorporate a minimum micrograzer  
203 abundance ( $b$ ) that implicitly assumes that in the absence of zoospores the micrograzer  
204 population is maintained by the presence of other potential food sources; hence we model  
205 potential increases in micrograzer abundance over and above this minimum, dependent on  
206 consumption of *Bd* zoospores. Estimates of  $d$  and  $b$  are based on our unpublished  
207 observations. Table 1 summarises the above parameters and the estimates used.

208 All model runs (100 d) were initiated with 10 sporangia  $\text{host}^{-1}$  (1 sporangium  $\text{ml}^{-1}$ ), 100  
209 zoospores  $\text{ml}^{-1}$ , and 1 micrograzer  $\text{ml}^{-1}$  (again assumed to be the minimal population size,  
210 maintained by other resources in the environment). For *Bd*, we applied parameter values that  
211 were within the range explored by Briggs *et al.* [8] (Table 1).

212 We first performed simulations to assess the ability of *T. pyriformis* to control *Bd*. Then,  
213 we assessed the extent to which micrograzers that are inferior to *T. pyriformis* could control

## Disease control by micrograzers

214 *Bd*, through exploration of micrograzer parameter space. Inferior micrograzers had reduced  
215 maximum ingestion rate (up to  $0.5 \times I_{\max}$  of *T. pyriformis*) and increased half saturation  
216 constant (up to  $2 \times k$  of *T. pyriformis*); see Fig. 4 for an indication of the range of these  
217 responses. To quantify the impact of micrograzers on *Bd*, we examined the maximum  
218 abundance (over the 100 days) and the abundances at 50 and 100 days of *S*, *Z*, and *G*.

219

## 220 Results

### 221 *Assessing growth of micrograzer species on Bd*

222 All of the micrograzers can be maintained in laboratory cultures, with maximum growth  
223 rates ranging from  $\sim 0.4$  to  $2 \text{ d}^{-1}$  (Fig 2), and all died when maintained on water alone,  
224 indicating their relative mortality rates when starved (Fig. 2). When fed *Bd*, micrograzers  
225 exhibited four distinct responses (Fig. 2): 1) for the ciliate *Stentor coeruleus* the death rate  
226 was significantly (and substantially) higher than in water alone; 2) for the ciliates  
227 *Urocentrum turbo*, *Blepharisma* sp., and *Oxytrichia* sp. and the rotifer *Philodina* sp. there  
228 was no significant difference between death rate with or without *Bd*; 3) for the rotifer  
229 *Brachionus calyciflorous* growth rate initially increased (i.e. after 48 h) followed by death,  
230 and for the ciliates *Paramecium aurelia* and *P. caudatum* (Fig. 3) the growth rate was  
231 initially positive when *Bd* was present followed by a negative growth rate as time progressed  
232 – on average over the incubation *P. aurelia* exhibited negative growth while *P. caudatum*  
233 exhibited zero growth (Fig. 3); and 4) for the ciliate *Tetrahymena pyriformis* there was a  
234 sustained positive growth rate (Fig. 2), which was significantly higher than the negative  
235 growth rate on water alone; this growth rate of  $\sim 1.7 \pm 0.23$  (SE)  $\text{d}^{-1}$  was equal to that when  
236 the ciliate was grown axenically on H-broth (unpublished data) and near its maximum rate  
237 under any conditions.

### 238 *Quantifying the functional response of Tetrahymena grazing on Bd*

## Disease control by micrograzers

239 As *T. pyriformis* grew on zoospores alone it was clear that this ciliate ingested *Bd*  
240 zoospores. Zoospores were also observed in *T. pyriformis*, in the food vacuoles of the ciliate,  
241 under 40 x magnification. Ingestion rate followed a typical Type II (rectangular hyperbolic)  
242 functional response (Fig. 4, adjusted  $R^2 = 0.82$ ), with  $I_{\max} = 1.63 \times 10^3 \pm 98$  (SE) prey  $d^{-1}$  and  
243  $k = 5.75 \times 10^3 \pm 1.38 \times 10^3$  (SE) prey  $ml^{-1}$ .

### 244 **Modelling micrograzer impacts on *Bd* populations**

245 Control of *Bd* occurred when parameters for the micrograzer (*T. pyriformis*) were  
246 included in the model (Fig. 5). In the absence of the micrograzer, sporangia per host reached  
247 lethal levels ( $>10^4$  host $^{-1}$  [8]) by ~55 days (Fig. 5a). However, when micrograzers were  
248 included their population rose from 1 to ~35  $ml^{-1}$ , with the result that sporangia were limited  
249 to a maximum of  $3 \times 10^3$  per host (i.e. based on the assumption that  $10^4$  sporangia is a lethal  
250 limit, the host would survive), and *Bd* was virtually eradicated by 100 days (Fig. 5b).

251 We then assessed the ability of micrograzers that were inferior to *T. pyriformis* to control  
252 *Bd*, through exploration of micrograzer parameter space: i.e. up to twice the half saturation  
253 ( $k$ ) and half the maximum ingestion rate ( $I_{\max}$ ) of *T. pyriformis* (Fig. 4). Fig. 5c illustrates  
254 population dynamics when the most inferior micrograzer was included (highest half-  
255 saturation constant and lowest maximum ingestion rate): the general pattern remained similar  
256 to that when *T. pyriformis* parameters were applied, with the micrograzers controlling *Bd*  
257 over 100 d, but the abundance of zoospores, sporangia, and micrograzers were more than 10  
258 times greater than the simulation including *T. pyriformis*, leading to predicted host death at  
259 ~55 days and a peak in abundance at ~70 days.

260 We then examined the pattern of the temporal dynamics across a wider range of  
261 parameter space (representing a range of predators-types) by reporting the maximum  
262 abundance and the abundances at 50 and 100 days of zoospores, sporangia, and micrograzers.  
263 Across all parameters explored, the micrograzer population provided top-down control of *Bd*,

## Disease control by micrograzers

264 as over the entire range *Bd* was virtually eradicated by 100 days (Fig. 6 c, f). However, the  
265 quantitative levels and rates of control varied considerably with micrograzer efficiency: with  
266 reduced  $I_{\max}$  and increased  $k$ , zoospores and sporangia reached higher maximum abundances  
267 (Fig. 6a, d) and persisted longer (Fig. 6b,e), indicating a decrease in the control of *Bd*. In  
268 particular, micrograzers with  $< 0.7 I_{\max}$  ( $\sim 10^3$  prey  $\text{d}^{-1}$ ) and  $> 1.5 \times k$  ( $\sim 9 \times 10^4 \text{ ml}^{-1}$ ) were not  
269 capable of preventing sporangia per host exceeding lethal levels of  $10^4$  per host (the yellow-  
270 to-red region on Fig. 6 d). Decreased  $I_{\max}$  and increased  $k$  also led to increases in micrograzer  
271 abundance (Fig 6. g-i), in response to the increased spore levels available under these grazing  
272 regimes.

273

## 274 Discussion

275 Control of a wide range of diseases caused by zoosporic fungi may be achieved through  
276 consumption on aquatic, motile zoospores by micrograzers [3-5]. Here, we explore the  
277 dynamics by which micrograzers may play a pivotal role in controlling the devastating  
278 amphibian disease chytridiomycosis, caused by the micro-fungus *Batrachochytrium*  
279 *dendrobatidis* (*Bd*). Previously, it has been shown that several micrograzers may consume  
280 *Bd* zoospores [12]. We expand on this by first indicating that some protozoa can also grow  
281 on *Bd* zoospores for short periods, and that the ubiquitous ciliate *Tetrahymena pyriformis*  
282 grows at near maximal rates on zoospores alone for extended periods. Recognising that  
283 micrograzers will grow on *Bd*, provides essential information for modelling population  
284 dynamics. We then provide an assessment of the functional response of *T. pyriformis* feeding  
285 on spore-sized prey, also required for establishing a population model. Finally, using our  
286 data and literature estimates, we develop and employ a novel model that couples the *Bd* life  
287 cycle with micrograzer-control on zoospores. This synthesis reveals the dynamics by which

## Disease control by micrograzers

288 micrograzers may suppress *Bd* loads and argues that for theoretical predictions of *Bd*-host  
289 interactions it will be useful to consider embedding these into the larger microbial food web.

### 290 ***Micrograzer growth on Bd***

291 Previous work has suggested that a large range of micrograzers will consume *Bd*  
292 zoospores and may reduce *Bd* viability[12]. We have extended this observation by assessing  
293 if *Bd* provides nutritional benefits, that support micrograzer growth. All of the micrograzers  
294 we examined could ingest *Bd*, but they exhibited a range of growth-responses. For one  
295 ciliate, *S. coeruleus*, *Bd* appeared to be toxic (possibly explaining previous reports that *S.*  
296 *coeruleus* does not reduce *Bd* viability;[12]), while other species seemed to obtain no  
297 nutritional benefit (Fig. 2). However, several species benefited from ingesting *Bd*. Both  
298 *Paramecium aurelia* and *P. caudatum* initially grew, although this was not sustained (Fig. 3),  
299 suggesting that while *Bd* is of some value, it may lack essential nutrients for these ciliates. In  
300 contrast, *Tetrahymena pyriformis* sustained positive growth, indicating that *Bd* can provide a  
301 complete diet for certain species. These observations are supported by previous work on  
302 ciliates: *T. pyriformis* and a closely related species, *Colpidium striatum*, also grow on yeast  
303 (*Saccharomyces*), while *P. aurelia*, and *P. caudatum* cannot, again possibly due to a lack of  
304 nutrients such as essential fatty acids and B-vitamins [38, 39].

305 Our analysis, therefore, suggest that not all micrograzers would be capable of or equally  
306 proficient at controlling *Bd*. However, with additional prey sources to sustain the consumers,  
307 there may be selective feeding on *Bd*. For instance, *T. pyriformis* differentiates between prey,  
308 leading to a more efficient assimilation of prey biomass and a greater cell yield of ciliates  
309 [40]. Likely, in the mesocosm experiments conducted by Schmeller et al. [12], where  
310 *Paramecium* controlled *Bd*, this ciliate's diet was supplemented by naturally occurring  
311 bacteria. In fact, in our initial growth-experiments, where antibiotics were not included,  
312 bacteria grew, and *Paramecium caudatum* consumed zoospores in addition to bacteria and

## Disease control by micrograzers

313 maintained extended positive growth (Supplement 1). Our analysis here has focused on *Bd*  
314 as the sole food source and indicates that micrograzer dynamics (growth and ingestion) lead  
315 to control of *Bd* populations. These findings argue that *Bd*-host dynamics should now be  
316 examined in a wider food-web context, with mixed an assemblage of micrograzers sustained  
317 by *Bd* and a wider range of natural food sources.

### 318 ***Tetrahymena* grazing on *Bd***

319 Globally, *Tetrahymena* is common in shallow waters, living near sediments, where it  
320 consumes bacteria and other microbes [41, 42]. These are the same habitats that *Bd* occupies.  
321 *Tetrahymena* is also associated with amphibians where it may be an opportunistic  
322 ectoparasite [43, 44], but possibly also a consumer of *Bd* zoospores as they emerge from  
323 sporangia. Considering its habitat and ability to rapidly reproduce on *Bd* alone, we focused  
324 on *T. pyriformis*' ingestion of *Bd* zoospores. In contradiction to Schmeller et al., attempts to  
325 stain *Bd* zoospores with calcofluor-white [12] were not successful; calcofluor stains chitin  
326 [45], and although *Bd* sporangia have a chitin wall, zoospores do not [28]. Therefore, this  
327 staining method seems inappropriate for *Bd* zoospores. We then explored vital stains (e.g.  
328 cell tracker green), but again we were not successful. Consequently, ingestion estimates  
329 relied on the uptake of fluorescent beads as surrogates for *Bd*, which may underestimate rates  
330 (e.g. [46]). We, therefore, see our predictions as conservative. From our data, a clear Type II  
331 functional response was obtained for *T. pyriformis* (Fig. 4), providing essential parameters for  
332 modelling *Bd*-micrograzer dynamics (see Methods). To our knowledge, this is the first time a  
333 functional response on *Bd* sized particles has been obtained for any *Tetrahymena* species: the  
334 estimates of  $I_{\max}$  and  $k$  are within the range of those obtained for other ciliates, although the  $k$ -  
335 values are on the lower end of the spectrum [39, 47, 48]; our modelling, therefore, includes  
336 micrograzers that are inferior to *Tetrahymena*.

### 337 **Modelling micrograzer impacts on *Bd* populations**

## Disease control by micrograzers

338 Empirical evidence suggests that *Paramecium* can reduce *Bd* infections, through  
339 examining end point estimates of host infection [12]. Here we explore the temporal  
340 dynamics of such control and the potential for micrograzers to prevent host death. Our  
341 analysis is reductionist and hence more qualitative than quantitative in its predictions.  
342 However, it clearly reveals that by applying plausible parameters for both the parasite and  
343 micrograzer, in a local environment, chytridiomycosis may at times be prevented and *Bd*  
344 virtually eradicated, or at least reduced to negligible levels (Fig. 6). Critically, it suggests the  
345 time scales over which such dynamics may occur. Admittedly, we indicate that micrograzers  
346 that are inferior to *T. pyriformis* are less likely to prevent host death, yet they still, ultimately,  
347 reduce *Bd* populations to negligible numbers, potentially preventing further disease outbreaks  
348 (Fig. 6). Our model, therefore, provides a mechanism to evaluate *Bd*-micrograzer dynamics,  
349 and its predictions strongly argue for the continued exploration of micrograzers in *Bd*  
350 research, specifically, and in the control of a range of diseases that spread through zoospores  
351 or other similarly sized dispersal stages [3-5].

352 To date, models of *Bd*-dynamics [8, 9, 49, 50] have not included estimates of spore loss  
353 by micrograzers. As indicated above, the modelling provided here is instructive and could  
354 benefit from elaboration. Given the ubiquity of protozoa in natural waters [2], and the clear  
355 indication of their potential impact (Fig. 6, [3-5]), we suggest there is now a need for better  
356 parameterization of micrograzer-*Bd* responses. We suggest three main directions. First,  
357 micrograzers, and specifically *Tetrahymena*, exhibit chemosensory behaviour [35]; the extent  
358 to which protozoa are attracted to amphibian hosts and *Bd* requires evaluation. Second, as  
359 indicated above, the role of *Bd* as a supplement rather than a sole dietary component deserves  
360 attention. Finally, the Rosenzweig-MacArthur predator-prey model, which we used, has  
361 limitations. Model structures such as the independent response model [51] that rely,  
362 independently, on growth and ingestion responses provide better predictions [52]. To this

## Disease control by micrograzers

363 end, we suggest that both functional (ingestion) and numerical (growth) responses associated  
364 with *Bd* abundance are established for a range of micrograzers.

### 365 ***Future directions for microbial ecology and Bd***

366 Both *Tetrahymena* and *Paramecium* are common species in shallow waters [41, 42, 53],  
367 that, as we have shown, are capable of growth on *Bd* zoospores for limited to extended times.  
368 Undoubtedly, other protozoa will also consume and grow on *Bd* zoospores. We, therefore,  
369 suggest that the role of micrograzers is considered when evaluating *Bd*-dynamics and the  
370 dynamics of other zoosporic diseases. Contributions of micrograzers to disease dynamics are  
371 also likely to have a highly site-specific component, due to their dependence on  
372 environmental factors [12]. For instance, chytridiomycosis is more prevalent at higher  
373 altitudes [34], which will often be both cooler and oligotrophic. While temperature may, in  
374 part, determine infection burdens [54], there will likely be an interaction with the trophic  
375 status of the water. If in oligotrophic waters bacteria are reduced below levels sufficient to  
376 support ciliates ( $<10^6$  ml<sup>-1</sup>), top-down control may be absent, and our analysis suggests that  
377 *Bd* may thrive, resulting in chytridiomycosis. Consequently, assessing the abundance of  
378 micrograzers in waters where chytridiomycosis occurs or is predicted seems warranted.

379 We end with some speculations on the potential for biomanipulation using micrograzers,  
380 as this has been considered by others [12]. Traditional approaches for managing wildlife  
381 diseases have proven ineffectual or impractical for *Bd*. Treating amphibians with probiotic  
382 bacteria directly has generally been unsuccessful as a conservation strategy (but see [34]),  
383 and, while theoretically plausible, culling hosts to below the critical threshold for disease  
384 transmission contravenes conservation objectives [55-57]. This means that alternative  
385 mitigation and management strategies must be perused. To date, the only successful effort  
386 towards in situ *Bd*-mitigation relied on dosing animals with antifungal chemicals alongside  
387 applying chemical disinfectants directly to the environment to reduce spore survival [55].



## Disease control by micrograzers

388 Fungicides and chemical disinfection, however, have shortcomings, not least of which are  
389 ethical issues associated with indiscriminate toxic effects. As both *Tetrahymena* and  
390 *Paramecium* are already common if not ubiquitous in aquatic environments and are simple  
391 and inexpensive to grow in large quantities [42, 53], they may be tractable target species for  
392 biomanipulation. We, therefore, support previous suggestions Schmeller et al. [12] that by  
393 augmenting natural densities of these species, through addition or supplementary feeding, it  
394 may be possible to reduce zoospore densities for *Bd* in situ. However, an introduction or  
395 population increase of any species could have detrimental, ecosystem-changing effects that  
396 require in depth evaluation before application [58]. Further evaluation of the role of  
397 micrograzers is, therefore, required before we can understand their likely impact in natural  
398 conditions, and advocate the implementation of such approaches.  
399

## Disease control by micrograzers

400

### 401 **Acknowledgments**

402 This work was conducted as part of postgraduate project (HF) at the University of Liverpool  
403 and was supported by funding provided to JJ through the Program for Training University  
404 Teachers by Shanghai Municipal Education Commission. AF and TG were funded by the  
405 NERC grant NE/N009800/1. MCF is a CIFAR fellow with *Bd* research supported by NERC  
406 NE/K014455/1. Eleanor Ambrose, Philip Bahan, Valentina Iorio, and Sam Moss provided  
407 invaluable technical support.

### 408 **Conflict of Interest**

409 The authors declare that the research was conducted in the absence of any commercial or  
410 financial relationships that could be construed as a potential conflict of interest.

411

## Disease control by micrograzers

### 412 **References**

- 413 1. Azam F, Fenchel T, Field JG, Gray JS, Meyer-Reil LA, Thingstad F. The ecological role of water-  
414 column microbes in the sea. *Mar Ecol Prog Ser.* 1983; 10: 257-63.
- 415 2. Fenchel T. *Ecology of protozoa—the biology of free-living phagotrophic protists.* New York,  
416 USA: Springer Verlag; 1987.
- 417 3. Kagami M, Miki T, Takimoto G. Mycoloop: chytrids in aquatic food webs. *Front Microbiol.*  
418 2014; 5: 166.
- 419 4. Frenken T, Agha R, Schmeller DS, van West P, Wolinska J. Biological concepts for the control of  
420 aquatic zoosporic diseases. *Trends Parasitol.* 2019; 35: 571-82.
- 421 5. Grossart HP, Rojas-Jimenez K. Aquatic fungi: targeting the forgotten in microbial ecology. *Curr*  
422 *Opin Microbiol.* 2016; 31: 140-5.
- 423 6. Scheele BC, Pasmans F, Skerratt LF, Berger L, Martel A, Beukema W, et al. Amphibian fungal  
424 panzootic causes catastrophic and ongoing loss of biodiversity. *Science.* 2019; 363: 1459-63.
- 425 7. Garner TWJ, Walker S, Bosch J, Leech S, Marcus Rowcliffe J, Cunningham AA, et al. Life  
426 history tradeoffs influence mortality associated with the amphibian pathogen *Batrachochytrium*  
427 *dendrobatidis*. *Oikos.* 2009; 118: 783-91.
- 428 8. Briggs CJ, Knapp RA, Vredenburg VT. Enzootic and epizootic dynamics of the chytrid fungal  
429 pathogen of amphibians. *Proc Natl Acad Sci U S A.* 2010; 107: 9695-700.
- 430 9. Woodhams DC, Alford RA, Briggs CJ, Johnson M, Rollins-Smith LA. Life-history trade-offs  
431 influence disease in changing climates: strategies of an amphibian pathogen. *Ecology.* 2008; 89:  
432 1627-39.
- 433 10. Buck JC, Truong L, Blaustein AR. Predation by zooplankton on *Batrachochytrium dendrobatidis*:  
434 biological control of the deadly amphibian chytrid fungus? *Biodivers Conserv.* 2011; 20: 3549-53.
- 435 11. Gleason FH, Lilje O, Marano AV, Sime-Ngando T, Sullivan BK, Kirchmair M, et al. Ecological  
436 functions of zoosporic hyperparasites. *Front Microbiol.* 2014; 5: 244.

## Disease control by micrograzers

- 437 12. Schmeller DS, Blooi M, Martel A, Garner TW, Fisher MC, Azemar F, et al. Microscopic aquatic  
438 predators strongly affect infection dynamics of a globally emerged pathogen. *Curr Biol.* 2014; 24:  
439 176-80.
- 440 13. Hamilton PT, Richardson JML, Anholt BR. *Daphnia* in tadpole mesocosms: trophic links and  
441 interactions with *Batrachochytrium dendrobatidis*. *Freshw Biol.* 2012; 57: 676-83.
- 442 14. Maier MA, Uchii K, Peterson TD, Kagami M. Evaluation of daphnid grazing on microscopic  
443 zoospore fungi by using comparative threshold cycle quantitative PCR. *Appl Environ Microbiol.*  
444 2016; 82: 3868-74.
- 445 15. Searle CL, Mendelson JR, 3rd, Green LE, Duffy MA. *Daphnia* predation on the amphibian  
446 chytrid fungus and its impacts on disease risk in tadpoles. *Ecol Evol.* 2013; 3: 4129-38.
- 447 16. Buck JC, Rohr JR, Blaustein AR. Effects of nutrient supplementation on host-pathogen dynamics  
448 of the amphibian chytrid fungus: a community approach. *Freshw Biol.* 2016; 61: 110-20.
- 449 17. Dionne JC. Tadpole holes; a true biogenic sedimentary structure. *J Sediment Res Sect B Stratigr*  
450 *Glob Stud.* 1969; 39: 358-60.
- 451 18. Beiswenger RE. Diel patterns of aggregative behavior in tadpoles of *Bufo americanus*, in relation  
452 to light and temperature. *Ecology.* 1977; 58: 98-108.
- 453 19. Thurnheer S, Reyer HU. Diel patterns of aggregative behavior in tadpoles of *Bufo americanus*, in  
454 relation to light and temperature. *Amphib-Reptilia.* 2001; 22: 21-32.
- 455 20. Kirshtein JD, Anderson CW, Wood JS, Longcore JE, Voytek MA. Quantitative PCR detection of  
456 *Batrachochytrium dendrobatidis* DNA from sediments and water. *Dis Aquat Organ.* 2007; 77: 11-  
457 5.
- 458 21. Walker SF, Salas MB, Jenkins D, Garner TW, Cunningham AA, Hyatt AD, et al. Environmental  
459 detection of *Batrachochytrium dendrobatidis* in a temperate climate. *Dis Aquat Organ.* 2007; 77:  
460 105-12.
- 461 22. Maguire C, DiRenzo GV, Tunstall TS, Muletz CR, Zamudio KR, Lips KR. Dead or alive?  
462 Viability of chytrid zoospores shed from live amphibian hosts. *Dis Aquat Organ.* 2016; 119: 179-  
463 87.

## Disease control by micrograzers

- 464 23. Piotrowski JS, Annis SL, Longcore JE. Physiology of *Batrachochytrium dendrobatidis*, a chytrid  
465 pathogen of amphibians. *Mycologia*. 2004; 96: 9-15.
- 466 24. Moss AS, Reddy NS, Dortaj IM, San Francisco MJ. Chemotaxis of the amphibian pathogen  
467 *Batrachochytrium dendrobatidis* and its response to a variety of attractants. *Mycologia*. 2008;  
468 100: 1-5.
- 469 25. Garmyn A, Van Rooij P, Pasmans F, Hellebuyck T, Van Den Broeck W, Haesebrouck F, et al.  
470 Waterfowl: potential environmental reservoirs of the chytrid fungus *Batrachochytrium*  
471 *dendrobatidis*. *PLoS ONE*. 2012; 7: e35038.
- 472 26. Chalkley HW. Stock cultures of *Ameba*. *Science*. 1930; 71: 442.
- 473 27. Montagnes DJS. Growth responses of planktonic ciliates in the genera *Strobilidium* and  
474 *Strombidium*. *Mar Ecol Prog Ser*. 1996; 130: 241-54.
- 475 28. Berger L, Hyatt AD, Speare R, Longcore JE. Life cycle stages of the amphibian chytrid  
476 *Batrachochytrium dendrobatidis*. *Dis Aquat Organ*. 2005; 68: 51-63.
- 477 29. Montagnes DJS, Berges JA. Determining parameters of the numerical response. *Microb Ecol*.  
478 2004; 48: 139-44.
- 479 30. Berges JA, Montagnes DJS, Hurd CL, Harrison PJ. Fitting ecological and physiological data to  
480 rectangular hyperbolae: a comparison of methods using monte carlo simulations. *Mar Ecol Prog*  
481 *Ser*. 1994; 114: 175-83.
- 482 31. Turchin P. *Complex population dynamics: a theoretical/empirical synthesis*. Oxford: Princeton  
483 University Press; 2003.
- 484 32. Kilpatrick AM, Briggs CJ, Daszak P. The ecology and impact of chytridiomycosis: an emerging  
485 disease of amphibians. *Trends Ecol Evol*. 2010; 25: 109-18.
- 486 33. Fisher MC, Bosch J, Yin Z, Stead DA, Walker J, Selway L, et al. Proteomic and phenotypic  
487 profiling of the amphibian pathogen *Batrachochytrium dendrobatidis* shows that genotype is  
488 linked to virulence. *Mol Ecol*. 2009; 18: 415-29.
- 489 34. Walker SF, Bosch J, Gomez V, Garner TW, Cunningham AA, Schmeller DS, et al. Factors  
490 driving pathogenicity vs. prevalence of amphibian panzootic chytridiomycosis in Iberia. *Ecol Lett*.  
491 2010; 13: 372-82.

## Disease control by micrograzers

- 492 35. Leick V, Hellung-Larsen P. Chemosensory behaviour of *Tetrahymena*. *Bioessays*. 1992; 14: 61-6.
- 493 36. Montagnes DJS, Barbosa AB, Boenigk J, Davidson K, Jürgens K, Macek M, et al. Selective  
494 feeding behaviour of key free-living protists. *Aquat Microb Ecol*. 2008; 53: 83-98.
- 495 37. Montagnes DJS, Zhu X, Gu L, Sun Y, Wang J, Horner R, et al. False exclusion: a case to embed  
496 predator performance in classical population models. *Am Nat*. 2019; 194: 654-70.
- 497 38. Hirayama K, Satuito C, The nutritional improvement of baker's yeast for the growth of the rotifer,  
498 *Brachionus plicatilis*, In: Fulks W, Main K, editors. Rotifer and microalgae culture systems. The  
499 Oceanic Institute, Honolulu: Proceedings of a U.S.-Asia Workshop; 1991. p. 151-62.
- 500 39. Pritchard JO, Porter AH, Montagnes DJS. Did gause have a yeast infection? *J Eukaryot*  
501 *Microbiol*. 2016; 63: 552-7.
- 502 40. Thurman J, Parry JD, Hill PJ, Laybourn-Parry J. The filter-feeding ciliates *Colpidium striatum*  
503 and *Tetrahymena pyriformis* display selective feeding behaviours in the presence of mixed,  
504 equally-sized, bacterial prey. *Protist*. 2010; 161: 577-88.
- 505 41. Doerder FP. Barcodes reveal 48 new species of *Tetrahymena*, *Dexiostoma*, and *Glaucoma*:  
506 phylogeny, ecology, and biogeography of new and established species. *J Eukaryot Microbiol*.  
507 2019; 66: 182-208.
- 508 42. Simon EM, Nanney DL, Doerder FP, The *Tetrahymena pyriformis* complex of cryptic species, In:  
509 Foissner W, Hawksworth D, editors. Protist diversity and geographical distribution Dordrecht, the  
510 Netherlands: Springer; 2007. p. 131-46.
- 511 43. Holz PH, Portas T, Donahoe S, Crameri S, Rose K. Mortality in northern corroboree frog tadpoles  
512 (*Pseudophryne pengilleyi*) associated with *Tetrahymena*-like infection. *Aust Vet J*. 2015; 93: 295-  
513 7.
- 514 44. Thompson JC. Experimental infections of various animals with strains of the genus *Tetrahymena*.  
515 *J Eukaryot Microbiol*. 1958; 5: 203-5.
- 516 45. Hageage GJ, Harrington BJ. Use of calcofluor white in clinical mycology. *Laboratory Medicine*.  
517 1984; 15: 109-12.
- 518 46. Montagnes DJS, Lessard E. Population dynamics of the marine planktonic ciliate *Strombidinopsis*  
519 *multiaris*. *Aquat Microb Ecol*. 1999; 20: 167-81.

## Disease control by micrograzers

- 520 47. Gismervik I. Numerical and functional responses of choreo- and oligotrich planktonic ciliates.  
521 *Aquat Microb Ecol.* 2005; 40: 163-73.
- 522 48. Jürgens K, Šimek K. Functional response and particle size selection of *Halteria* cf. *grandinella*, a  
523 common freshwater oligotrichous ciliate. *Aquat Microb Ecol.* 2000; 22: 57-68.
- 524 49. Louca S, Lampo M, Doebeli M. Assessing host extinction risk following exposure to  
525 *Batrachochytrium dendrobatidis*. *Proc Biol Sci.* 2014; 281: 20132783.
- 526 50. Mitchell KM, Churcher TS, Garner TW, Fisher MC. Persistence of the emerging pathogen  
527 *Batrachochytrium dendrobatidis* outside the amphibian host greatly increases the probability of  
528 host extinction. *Proc Biol Sci.* 2008; 275: 329-34.
- 529 51. Fenton A, Spencer M, Montagnes DJS. Parameterising variable assimilation efficiency in  
530 predator-prey models. *Oikos.* 2010; 119: 1000-10.
- 531 52. Li J, Montagnes DJS. Restructuring fundamental predator-prey models by recognising prey-  
532 dependent conversion efficiency and mortality rates. *Protist.* 2015; 166: 211-23.
- 533 53. Görtz DH. *Paramecium* Berlin: Springer; 1988.
- 534 54. Cohen JM, McMahon TA, Ramsay C, Roznik EA, Sauer EL, Bessler S, et al. Impacts of thermal  
535 mismatches on chytrid fungus *Batrachochytrium dendrobatidis* prevalence are moderated by life  
536 stage, body size, elevation and latitude. *Ecol Lett.* 2019; 22: 817-25.
- 537 55. Bosch J, Sanchez-Tome E, Fernandez-Loras A, Oliver JA, Fisher MC, Garner TW. Successful  
538 elimination of a lethal wildlife infectious disease in nature. *Biol Lett.* 2015; 11: pii: 20150874.
- 539 56. Garner TW, Schmidt BR, Martel A, Pasmans F, Muths E, Cunningham AA, et al. Mitigating  
540 amphibian chytridiomycoses in nature. *Philos Trans R Soc Lond B Biol Sci.* 2016; 371:  
541 20160207.
- 542 57. Hudson MA, Young RP, Lopez J, Martin L, Fenton C, McCrea R, et al. In-situ itraconazole  
543 treatment improves survival rate during an amphibian chytridiomycosis epidemic. *Biol Conserv.*  
544 2016; 195: 37-45.
- 545 58. Symondson WOC, K. D. Sunderland, Greenstone MH. Can generalist predators be effective  
546 biocontrol agents? *Annu Rev Entomol.* 2002; 47: 561-94.

## Disease control by micrograzers

- 547 59. Kasturi Bai AR, Srihari K, Shadaksharaswamy M, Jyothy PS. The effects of temperature on  
548 *Blepharisma intermedium*. J Protozool. 1969; 16: 738-43.
- 549 60. Weithoff G, Walz N. Influence of the filamentous cyanobacterium *Planktothrix agardhii* on  
550 population growth and reproductive pattern of the rotifer *Brachionus calyciflorus*. Hydrobiologia.  
551 1995; 313: 381-6.
- 552 61. Weisse T, Moser M, Scheffel U, Stadler P, Berendonk T, Weithoff G, et al. Systematics and  
553 species-specific response to pH of *Oxytricha acidotolerans* sp. nov. and *Urosomoida* sp.  
554 (ciliophora, hypotricha) from acid mining lakes. Eur J Protistol. 2013; 49: 255-71.
- 555 62. Finlay BJ. The dependence of reproductive rate on cell size and temperature in freshwater ciliated  
556 protozoa. Oecologia. 1977; 30: 75-81.
- 557 63. Salt JL, Bulit C, Zhang W, Qi H, Montagnes DJS. Spatial extinction or persistence: landscape-  
558 temperature interactions perturb predator-prey dynamics. Ecography. 2017; 40: 1177-86.
- 559 64. Inamori Y, Kuniyasu Y, Hayashi N, Ohtake H, Sudo R. Monoxenic and mixed cultures of the  
560 small metazoa *Philodina erythrophthalma* and *Aeolosoma hemprichi* isolated from a waste-water  
561 treatment process. Appl Microbiol Biotechnol. 1990; 34: 404-7.
- 562 65. Jackson KM, Berger J. Survival of ciliate protozoa under starvation conditions and at low  
563 bacterial levels. Microb Ecol. 1984; 10: 47-59.
- 564 66. Taylor WD. Maximum growth rate, size and commonness in a community of bacterivorous ciliates.  
565 Oecologia. 1978; 36: 263-72.
- 566 67. Montagnes DJS, Kimmance S, Atkinson D. Using Q10: can growth rates increase linearly with  
567 temperature? Aquat Microb Ecol. 2003; 32: 307-13.

## 568 **Figure Legends**

569 **Fig. 1** *Bd* infectious life cycle including the potential grazing pressure by micrograzers.  
570 Zoospores (*Z*) move using a flagellum, and on contact infect the amphibian host. Within the  
571 host epidermal cells, a spore then forms a sporangium (*S*) that releases further zoospores



## Disease control by micrograzers

572 through asexual reproduction ( $n$ ), after which the sporangium dies ( $\sigma$ ). Released zoospores  
573 may die naturally ( $\mu$ ) or be ingested ( $I$ ) by micrograzers ( $G$ ).

574 **Fig. 2** Average growth rates ( $r$ ,  $d^{-1}$ ) for micrograzers fed *Bd* (black) or no prey (grey); error  
575 bars are one standard error, and \* indicates where significant ( $\alpha = 0.05$ ) differences occurred  
576 between fed and unfed treatments. Note that for *P. caudatum* growth rate was zero when fed  
577 *Bd*. The horizontal lines connected by a vertical line represent the range of predicted  
578 maximum growth rate (i.e. food saturated on suitable prey) at 18 °C, for each species. Data  
579 were obtained from a various sources at a range of temperatures [59-66] and were converted  
580 to rates at 18 °C by two methods, either assuming a  $Q_{10}$  of 2 or that growth rate varies  
581 linearly with temperature at a rate of  $0.07 r (d^{-1}) \text{ } ^\circ\text{C}^{-1}$  [67].

582 **Fig. 3** Average growth rates ( $r d^{-1}$ ) of three replicates of *Paramecium caudatum* (a) and  
583 *Paramecium aurelia* (b) in the *Bd* treatment, with standard error bars. The skull and  
584 crossbones indicate the time point where all individuals had died. The solid black line  
585 represents the average death rate of the micrograzers when no prey were present, and the  
586 dotted black line indicates the standard error of the control groups.

587 **Fig. 4** The functional response: ingestion rates of *Tetrahymena pyriformis* on surrogate  
588 zoospores (prey) vs prey concentration. Points are ingestion rates at defined prey  
589 abundances. The solid line represents the best fit of a Type II functional response to the data  
590 (see Results for the parameter estimates). The grey region represents the range of functional  
591 responses used to assess the ability of “inferior micrograzers” to control *Bd* (i.e. reduced  
592 maximum ingestion rate and increased half saturation constant; see Methods, Modelling  
593 micrograzer impacts on *Bd* populations).

## Disease control by micrograzers

594 **Fig. 5** Simulations of micrograzer (*T. pyriformis*) control of *Bd*, based on Eq. 1-3 and  
595 parameters presented in Table 1. a. *Bd* (zoospore and sporangia) dynamics in the absence of  
596 micrograzers, indicating that by ~55 days sporangia per host approach lethal limits (skull and  
597 crossbones,  $10^4$  sporangia per host Briggs et al. [8]). b. *Bd* and micrograzer dynamics,  
598 indicating control of zoospores and sporangia, maintaining sporangia numbers below the  
599 lethal limit. c. *Bd* and micrograzer dynamics based on an inferior micrograzer to *T.*  
600 *pyriformis* ( $0.5 \times I_{\max}$ ;  $2 \times k$  presented in Table 1), indicating the micrograzers inability to  
601 prevent host death at ~55 days (skull and crossbones) but its ability to ultimately reduce *Bd*  
602 levels by 100 d.

603 **Fig. 6** Exploration of *Bd*-micrograzer dynamics (Eq. 1-3), through varying two key  
604 micrograzer parameters: the half saturation constant ( $k$ ) and the maximum ingestion rate  
605 ( $I_{\max}$ ); see Methods for details. To characterise dynamics, we provide the log numbers of  
606 zoospores, sporangia, and micrograzers. For each, we present the maximum number reached  
607 over the 100 days, the number at 50 days, and the number at 100 days.

608

609

## Disease control by micrograzers

610 **Table 1** Parameters used to assess *Bd* dynamics (Eq. 1-3). *Bd* parameter estimates are from  
 611 Briggs et al. [8] who present a wide range of possible values; we have chosen one set of  
 612 these that provide an illustration of *Bd*-micrograzer dynamics. Micrograzer data are  
 613 from our functional response (Fig. 4). Conversion efficiency ( $e$ ) was estimated as  
 614 described in the text. The minimum number of micrograzers ( $b$ ) and micrograzer death  
 615 rate ( $d$ ) were derived from personal observations.

| Symbol     | Parameter                                         | Estimate           | Range explored<br>by Briggs et al.<br>[7] | Dimension     |
|------------|---------------------------------------------------|--------------------|-------------------------------------------|---------------|
| $\gamma$   | Rate of zoospores encounter with hosts            | (0.05)             | Large range of<br>values                  | $d^{-1}$      |
| $\nu$      | Fraction of successful <i>Bd</i> spore infections | 0.1                | 0-1                                       | dimensionless |
| $\eta$     | Production rate of zoospores from<br>sporangium   | 17.5               | --                                        | $d^{-1}$      |
| $\sigma$   | Sporangia loss rate                               | 0.2                | 0.1-0.3                                   | $d^{-1}$      |
| $\mu$      | Spore death rate                                  | 0.1 (1)            | 0.02-1                                    | $t^{-1}$      |
| $E$        | Conversion efficiency                             | $5 \times 10^{-4}$ |                                           | dimensionless |
| $I_{\max}$ | Maximum ingestion rate                            | 1630               |                                           | $S d^{-1}$    |
| $K$        | Half saturation constant                          | $5.75 \times 10^4$ |                                           | $S ml^{-1}$   |
| $d$        | Micrograzer death rate                            | 0.01               |                                           | $t^{-1}$      |
| $b$        | Minimum number of micrograzers                    | 1                  |                                           | $ml^{-1}$     |

616

617

## Disease control by micrograzers

618

619

620 Fig. 1

621

622

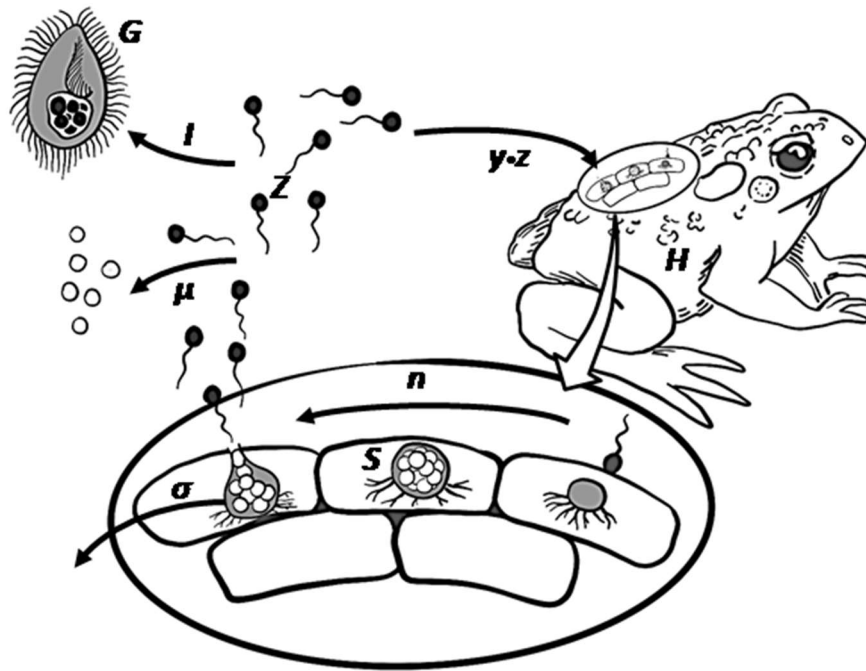

## Disease control by micrograzers

623 Fig. 2

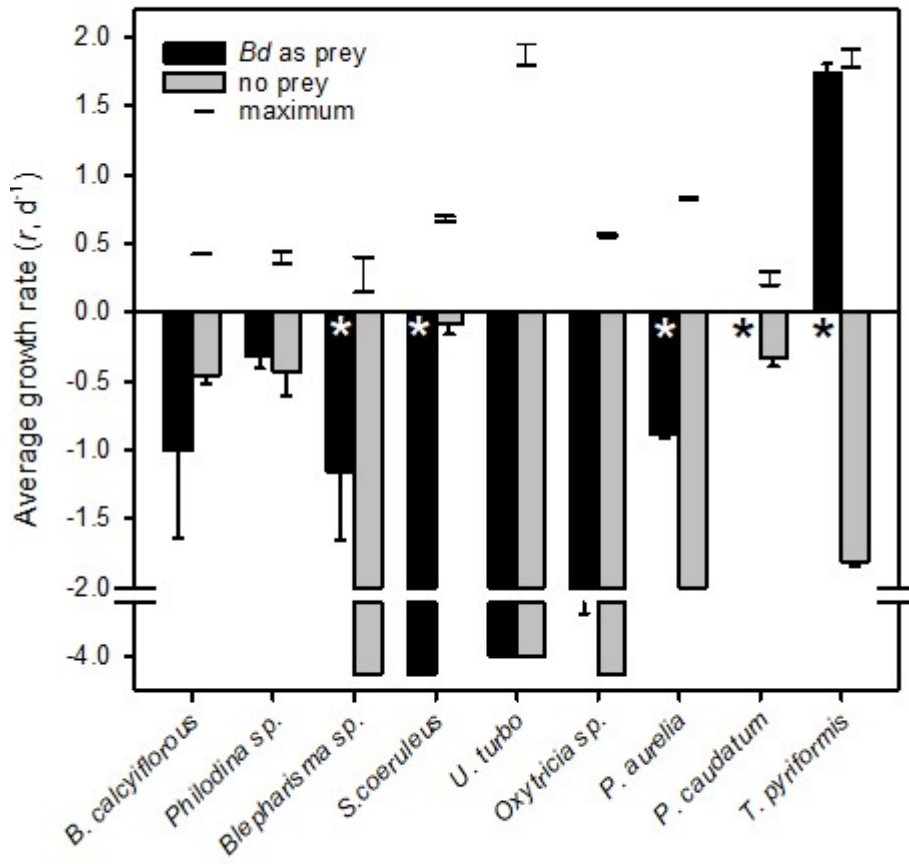

624

625

## Disease control by micrograzers

626 Fig. 3

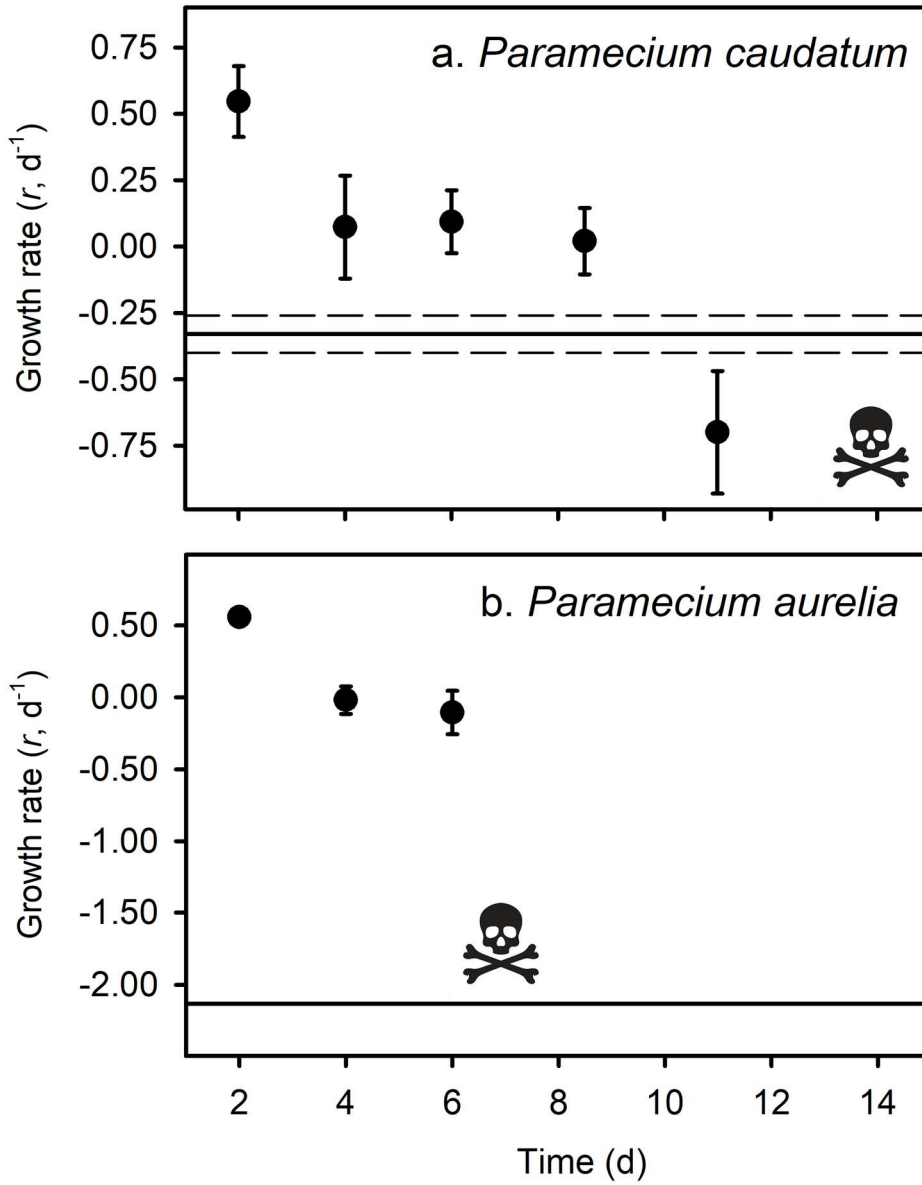

## Disease control by micrograzers

627 Fig. 4

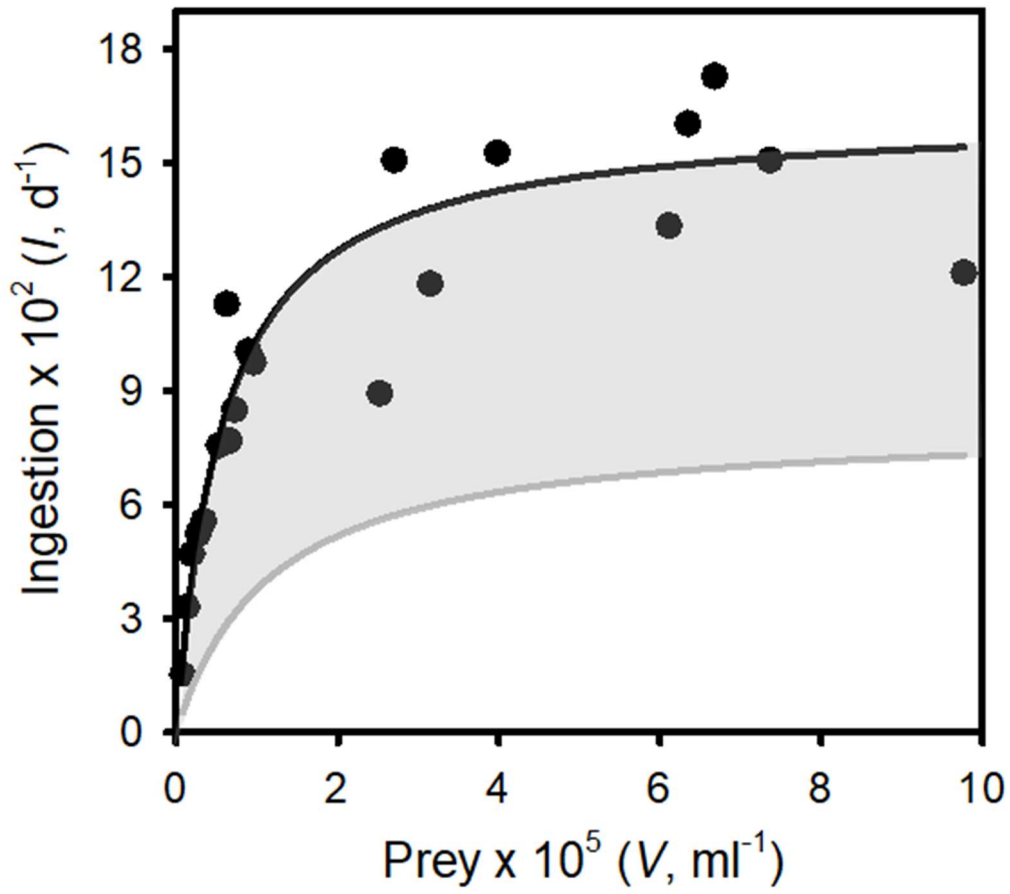

## Disease control by micrograzers

628 Fig. 5

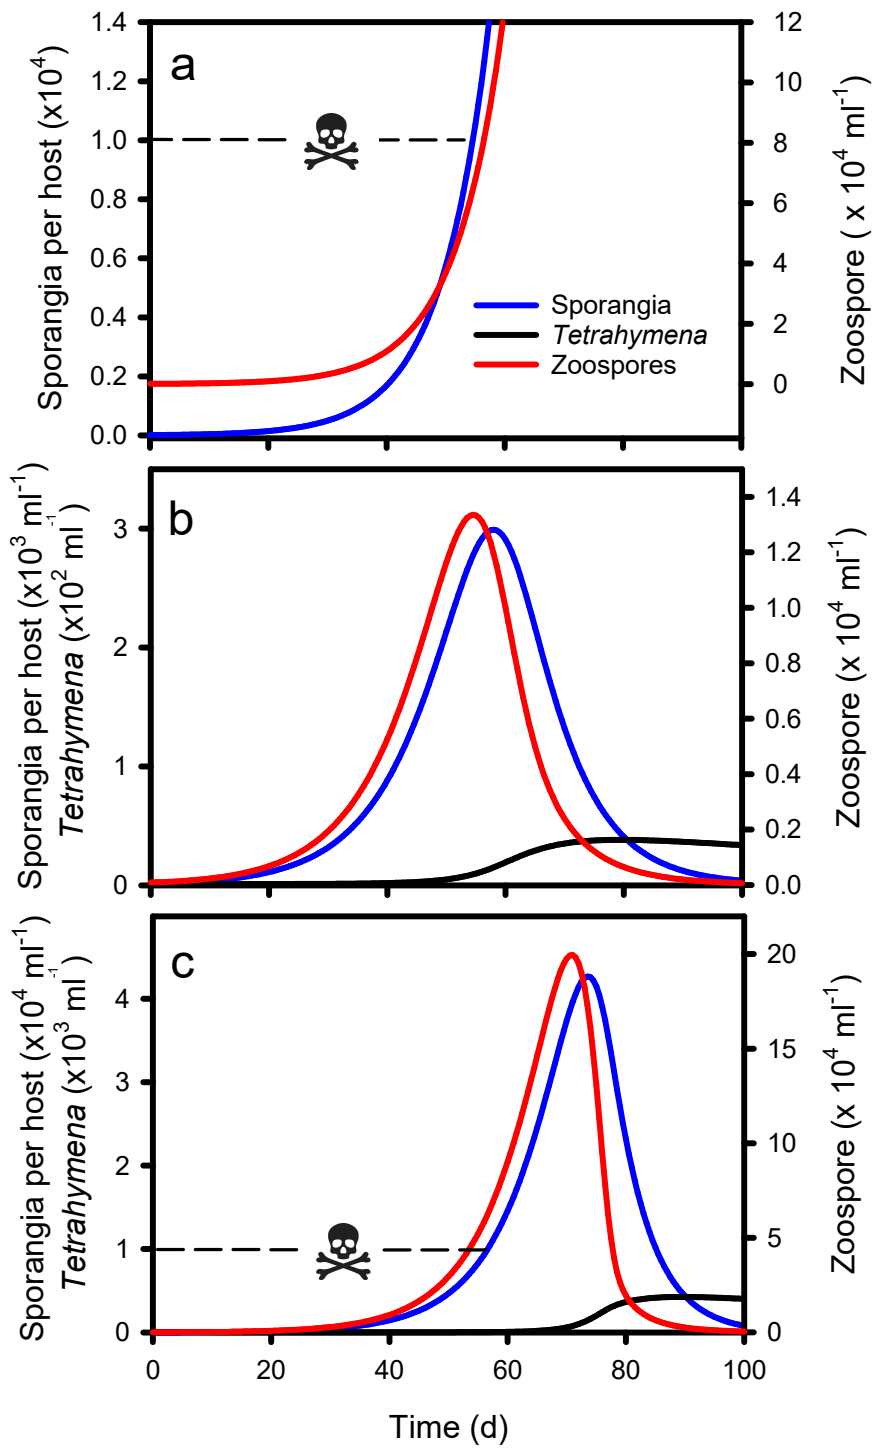

629



## Disease control by micrograzers

630 Fig. 6

631

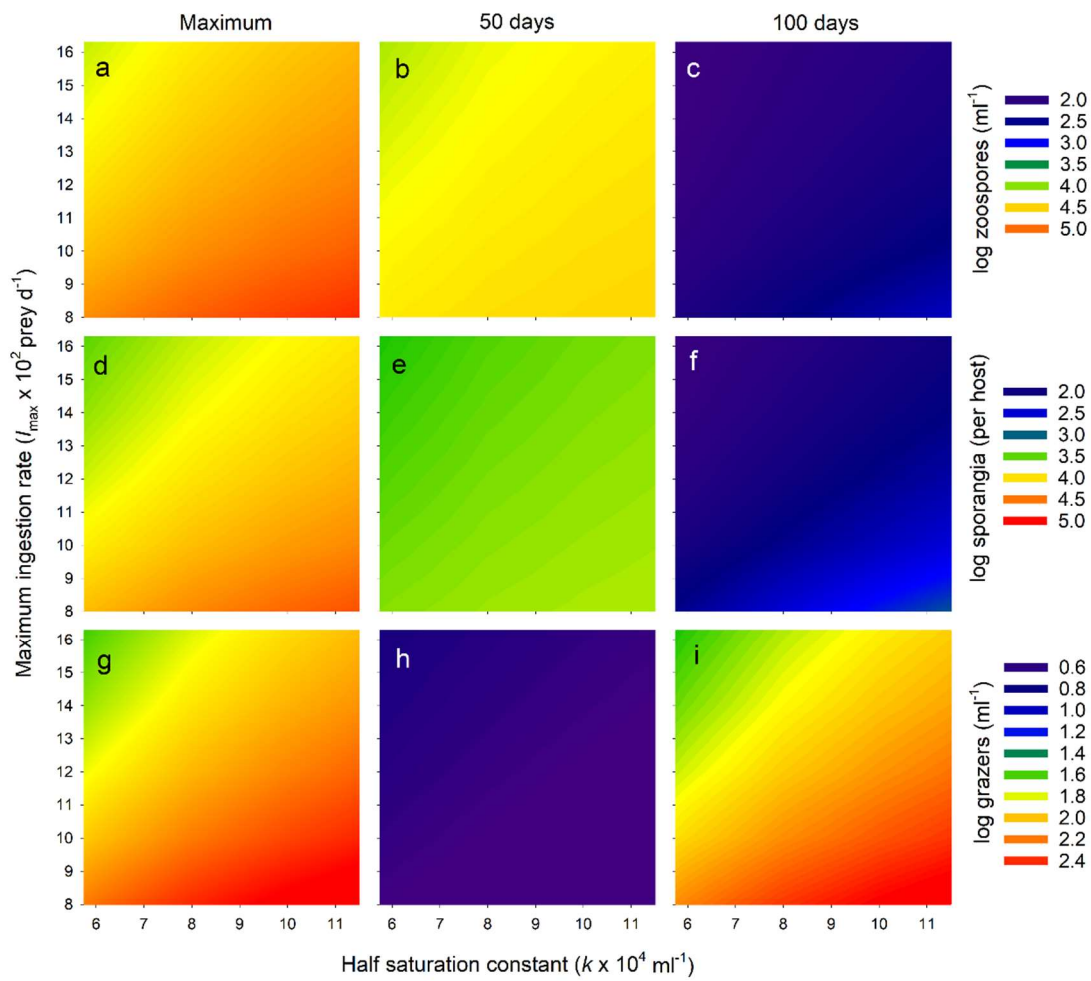

Source: https://www.biorxiv.org/content/10.1101/2020.02.03.931857v3.full.pdf
